# Supplementary material
Source: Frontiers journal article supplement (https://www.frontiersin.org/articles/182022)
Supplement: Image_3.pdf [file Image_3.pdf]

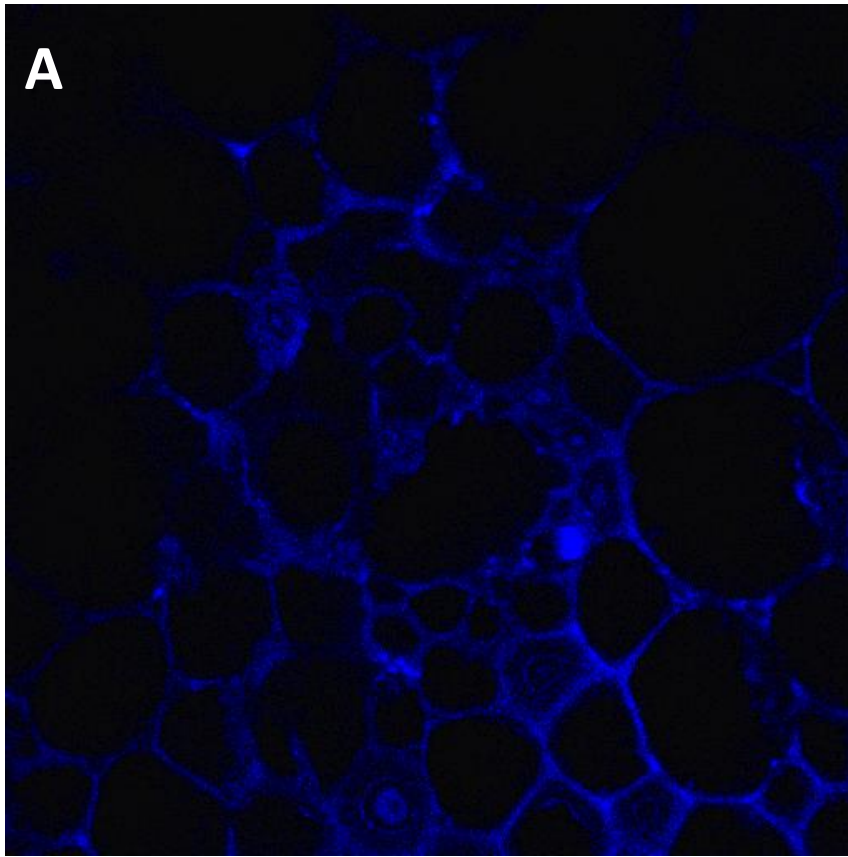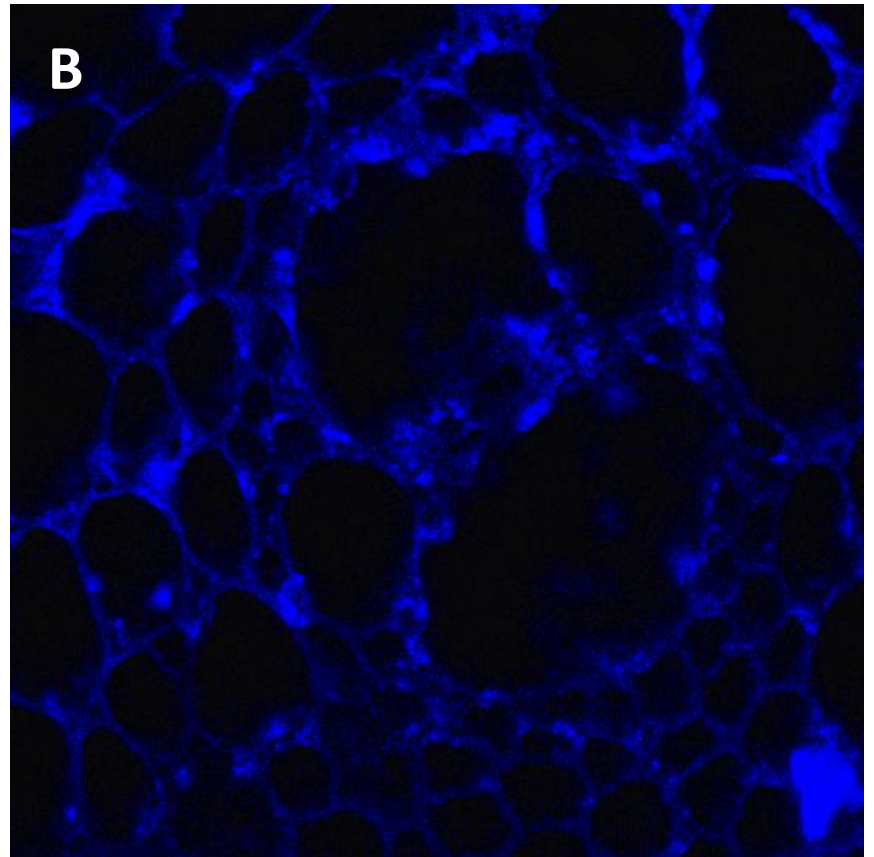

**Figure S3:** Confocal microscope movie showing cell wall structures of the infected wheat rachis of the resistant cultivar Sumai3 (SU3, A) and the susceptible cultivar Muchmore (MM, B) with Fusarium head blight (FHB) at 4 days post-inoculation period.
